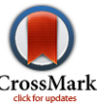

# The Product of Resting Heart Rate Times Blood Pressure Is Associated with High Brachial-Ankle Pulse Wave Velocity

Anxin Wang<sup>1,2,3</sup>, Jie Tao<sup>4</sup>, Xiuhua Guo<sup>2,3</sup>, Xuemei Liu<sup>4</sup>, Yanxia Luo<sup>2,3</sup>, Xiurong Liu<sup>4</sup>, Zhe Huang<sup>4</sup>, Shuohua Chen<sup>4</sup>, Xingquan Zhao<sup>1\*</sup>, Jost B. Jonas<sup>5†</sup>, Shouling Wu<sup>4\*\*†</sup>

**1** Department of Neurology, Beijing Tiantan Hospital, Capital Medical University, Beijing, China, **2** Department of Epidemiology and Health Statistics, School of Public Health, Capital Medical University, Beijing, China, **3** Beijing Municipal Key Laboratory of Clinical Epidemiology, Capital Medical University, Beijing, China, **4** Kailuan Hospital, Hebei United University, Tangshan, China, **5** Department of Ophthalmology, Medical Faculty Mannheim of the Ruprecht-Karls-University of Heidelberg, Heidelberg, Germany

## Abstract

**Objective:** To investigate potential associations between resting heart rate, blood pressure and the product of both, and the brachial-ankle pulse wave velocity (baPWV) as a maker of arterial stiffness.

**Methods:** The community-based “Asymptomatic Polyvascular Abnormalities in Community (APAC) Study” examined asymptomatic polyvascular abnormalities in a general Chinese population and included participants with an age of 40+ years without history of stroke and coronary heart disease. Arterial stiffness was defined as baPWV $\geq$ 1400 cm/s. We measured and calculated the product of resting heart rate and systolic blood pressure (RHR-SBP) and the product of resting heart rate and mean arterial pressure (RHR-MAP).

**Results:** The study included 5153 participants with a mean age of 55.1 $\pm$ 11.8 years. Mean baPWV was 1586 $\pm$ 400 cm/s. Significant ( $P<0.0001$ ) linear relationships were found between higher baPWV and higher resting heart rate or higher arterial blood pressure, with the highest baPWV observed in individuals from the highest quartiles of resting heart rate and blood pressure. After adjusting for confounding parameters such as age, sex, educational level, body mass index, fasting blood concentrations of glucose, blood lipids and high-sensitive C-reactive protein, smoking status and alcohol consumption, prevalence of arterial stiffness increased significantly ( $P<0.0001$ ) with increasing RHR-SBP quartile (Odds Ratio (OR): 2.72;95%Confidence interval (CI):1.46,5.08) and increasing RHR-MAP (OR:2.10;95%CI:1.18,3.72). Similar results were obtained in multivariate linear regression analyses with baPWV as continuous variable.

**Conclusions:** Higher baPWV as a marker of arterial stiffness was associated with a higher product of RHR-SBP and RHR-MAP in multivariate analysis. In addition to other vascular risk factors, higher resting heart rate in combination with higher blood pressure are risk factors for arterial stiffness.

**Citation:** Wang A, Tao J, Guo X, Liu X, Luo Y, et al. (2014) The Product of Resting Heart Rate Times Blood Pressure Is Associated with High Brachial-Ankle Pulse Wave Velocity. PLoS ONE 9(9): e107852. doi:10.1371/journal.pone.0107852

**Editor:** Yan Li, Shanghai Institute of Hypertension, China

**Received:** June 5, 2014; **Accepted:** August 14, 2014; **Published:** September 16, 2014

**Copyright:** © 2014 Wang et al. This is an open-access article distributed under the terms of the Creative Commons Attribution License, which permits unrestricted use, distribution, and reproduction in any medium, provided the original author and source are credited.

**Data Availability:** The authors confirm that all data underlying the findings are fully available without restriction. All relevant data are included within the paper.

**Funding:** This research was supported by a grant from the National Natural Science Foundation of China (Grant No. 81202279), and by a grant from advanced health care professional development project of Beijing Municipal Health Bureau (Grant No. 2009-3-32). The funders had no role in study design, data collection and analysis, decision to publish, or preparation of the manuscript.

**Competing Interests:** Co-author Jost Jonas is a PLOS ONE Editorial Board member. It is confirmed that this does not alter the authors' adherence to PLOS ONE Editorial policies and criteria, as detailed online in the guide for authors.

\* Email: zxq@vip.163.com (XZ); drwusl@163.com (SW)

✉ AW and JT contributed equally to and are first authors on this work.

† JBJ and SW are joint last authors on this work.

## Introduction

Brachial-ankle pulse wave velocity (baPWV) is an index of arterial stiffness and a marker of atherosclerosis that can be measured noninvasively [1–4]. It has been shown to be an independent predictor of all-cause and cardiovascular mortality as well as an indicator for cardiovascular diseases [3,5–7]. With the increasing use of baPWV in clinical practice as measure of arterial stiffness, the importance of understanding its associations with

other cardiovascular factors has increased. Although the mechanisms responsible for arterial stiffening have not conclusively been explored yet, it has been discussed that arterial stiffness may be due to structural changes in the tunica media of the arteries. Based on mechanical considerations, one may postulate that these changes, including fatigue fracture of elastin [8], are correlated with the cyclic stress caused by the frequency and amount of pulse-synchronous blood pressure fluctuations. Accordingly, previous

studies demonstrated that an elevated resting heart rate (RHR) was an independent risk factor for arterial stiffness [9–13]. We now put forward the hypothesis that in addition to pulse rate and independently of other cardiovascular risk factors, the product of pulse rate multiplied with blood pressure would be correlated with baPWV as a measure of arterial stiffness. We therefore conducted this study to examine the association between the blood pressure heart rate product and the baPWV in the asymptomatic polyvascular abnormalities community study (APAC).

**Methods**

APAC is a community-based, observational, prospective, long-term follow-up study to investigate the epidemiology of asymptomatic polyvascular abnormalities in Chinese adults [14]. The APAC study was performed according to the guidelines of Helsinki Declaration and was approved by the Ethics Committees of the Kailuan General Hospital and Beijing Tiantan Hospital. Written informed consent was obtained from all participants. The study cohort was a sub-population of a previously described population of the Kailuan study which included a total of 101,510 employees and retirees (81,110 men) of the Kailuan (Group) Co. Ltd, a large coal mine industry located in Tangshan, Hebei Province. The city of Tangshan with approximately 7.2 million inhabitants in 2006 is situated 150 km southeast of Beijing and is a center of the coal mining industry. From June 2010 to June 2011, a sample of 7000 subjects older than 40 years was randomly selected from the Kailuan cohort, using a stratified random sampling method by age and gender based on the data of the Chinese National Census from 2010. A total of 5,852 subjects agreed to participate in the APAC study and 5,816 people eventually completed the baseline data collection. Among these 5,816 individuals, 376 subjects did not meet the following inclusion criteria (1) no history of stroke, transient ischemic attack, and coronary heart disease at baseline as assessed by a validated questionnaire; and (2) absence of neurologic deficits typical for stroke which as examined by experienced physicians. The group of these 376 individuals not included into the study as compared to the study participants did not differ significantly in age ( $P = 0.83$ ) and gender ( $P = 0.79$ ). A total of 5,440 participants were eventually eligible and participated in the APAC study.

BaPWV, blood pressure and RHR were assessed with the person sitting for at least five minutes in a controlled environment at a room temperature of 22°C to 25°C. The study participants

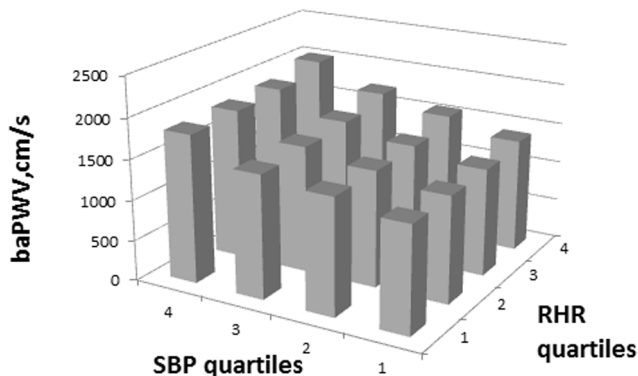

**Figure 1. Integrated Resting Heart Rate Quartiles (RHR) and Systolic Blood Pressure (SBP) Quartiles and their Association with Brachial-Ankle Pulse Wave Velocity (baPWV).** doi:10.1371/journal.pone.0107852.g001

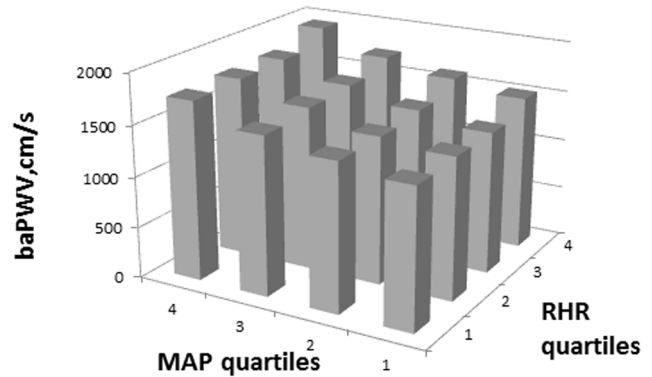

**Figure 2. Integrated Resting Heart Rate Quartiles (RHR) and Mean Arterial Blood Pressure (MAP) Quartiles and their Association with Brachial-Ankle Pulse Wave Velocity (baPWV).** doi:10.1371/journal.pone.0107852.g002

had refrained from smoking and drinking of coffee, tea or alcohol for at least three hours nor had any exercise been performed for the last 30 minutes prior to the measurement of baPWV, blood pressure and RHR. All examinations were carried out by specially trained physicians and nurses. All subjects were in a supine position in light clothing without pillow and were asked to stop moving and talking at the time of the examination. Electrodes of the electrocardiogram were placed on both wrists, a microphone for detecting heart sounds was placed on the left edge of the sternum, and cuffs were wrapped on both arms and ankles. The lower edge of the arm cuff was placed 2–3 cm above the transverse striation of cubital fossa, while the lower edge of the ankle was placed 1–2 cm above the superior aspect of the medial malleolus. Two readings of baPWV were taken from each body side, and the second reading was used. Then, the higher value of the left side and right side was used for the data analyses. The rationale for this procedure was that the higher value represented the more severe arterial stenosis of the whole body. In addition, we also used the lower value of the left side and right side in the sensitivity analysis, and the results were similar.

Blood pressure was measured on the left arm to the nearest 2 mmHg using a mercury sphygmomanometer and standard procedures. Three readings of the systolic and diastolic blood pressure were recorded, taken at 5-minute intervals. The average of three readings was used for the statistical analysis. If two of the three measurements differed by more than 5 mmHg, an additional reading was taken. Mean arterial pressure (MAP) was calculated as diastolic blood pressure plus one third of the difference of systolic blood pressure minus diastolic blood pressure. A 10-second 12-lead electrocardiography was carried out to measure the RHR after the individual had rested in the supine position for 5 minutes. The number of R-R intervals (number of QRS complexes - 1) was divided by the time difference between the first and last heartbeat, and the results were converted to beats per minute (bpm).

All participants underwent a clinical examination and a standardized interview including questions on smoking and alcohol consumption, socioeconomic parameters, diet, lifestyle, family medical history, physical activity, and sleeping time and quality, known diagnosis of arterial hypertension, coronary heart disease, diabetes mellitus, hyperlipidemia, and stroke, and about the current treatment of these diseases. Anthropomorphic parameters such as body height and weight and waist and hip

**Table 1.** Comparison of Demographic and Other Characteristics of Participants with Arterial Stiffness (Brachial-Ankle Pulse Wave Velocity  $\geq 1400$  cm/s) and without Arterial Stiffness (Brachial-Ankle Pulse Wave Velocity  $< 1400$  cm/s) in the Asymptomatic Polyvascular Abnormalities Community Study.

|                                                                     | Brachial-Ankle Pulse Wave Velocity (cm/s) |                   | P-Value |
|---------------------------------------------------------------------|-------------------------------------------|-------------------|---------|
|                                                                     | <1400                                     | $\geq 1400$       |         |
| n                                                                   | 1963                                      | 3190              |         |
| Age (Years)                                                         | 48.12 $\pm$ 6.39                          | 59.42 $\pm$ 12.32 | <0.0001 |
| Male Gender (Number (%))                                            | 945 (48.1%)                               | 2165 (67.9%)      | <0.0001 |
| Body Mass Index (kg/m <sup>2</sup> )                                | 24.7 $\pm$ 3.1                            | 25.1 $\pm$ 3.4    | <0.0001 |
| Marital Status (Married) (Number (%))                               | 1939 (98.8%)                              | 3082 (96.6%)      | <0.0001 |
| High-School Graduation (Number (%))                                 | 1865 (95.0%)                              | 2654 (83.2%)      | <0.0001 |
| Reported Income of Each Family Member ( $\geq 1000$ ¥) (Number (%)) | 1463 (74.5%)                              | 2596 (81.4%)      | <0.0001 |
| Current Smoker (Number (%))                                         | 574 (29.2%)                               | 1081 (33.9%)      | 0.0005  |
| Current Alcohol Drinker (Number (%))                                | 239 (12.2%)                               | 501 (15.7%)       | 0.0004  |
| Systolic Blood Pressure (mmHg)                                      | 119 $\pm$ 14                              | 139 $\pm$ 19      | <0.0001 |
| Diastolic Blood Pressure (mmHg)                                     | 79 $\pm$ 10                               | 85 $\pm$ 11       | <0.0001 |
| Mean Arterial Pressure (mmHg)                                       | 92.3 $\pm$ 10.4                           | 103 $\pm$ 12      | <0.0001 |
| Resting heart rate (beats per minute)                               | 68.3 $\pm$ 9.2                            | 71.8 $\pm$ 11.8   | <0.0001 |
| Brachial-Ankle Pulse Wave Velocity (cm/s)                           | 1250 $\pm$ 100                            | 1793 $\pm$ 375    | <0.0001 |
| Resting Heart Rate Systolic Blood Pressure Product                  | 8122 $\pm$ 1532                           | 9991 $\pm$ 2232   | <0.0001 |
| Resting Heart Rate Mean Arterial Pressure Product                   | 6317 $\pm$ 1182                           | 7418 $\pm$ 1592   | <0.0001 |
| Fasting Blood Concentrations of:                                    |                                           |                   |         |
| Glucose (mmol/L)                                                    | 5.24 $\pm$ 0.96                           | 5.80 $\pm$ 1.73   | <0.0001 |
| High-Density Lipoprotein Cholesterol (mmol/L)                       | 1.67 $\pm$ 0.47                           | 1.60 $\pm$ 0.44   | <0.0001 |
| Low-Density Lipoprotein Cholesterol (mmol/L)                        | 2.53 $\pm$ 0.66                           | 2.69 $\pm$ 0.83   | <0.0001 |
| Triglycerides (mmol/L)                                              | 1.50 $\pm$ 1.25                           | 1.79 $\pm$ 1.51   | <0.0001 |
| Total Cholesterol (mmol/L)                                          | 1.43 $\pm$ 0.64                           | 1.60 $\pm$ 0.73   | <0.0001 |
| High-Sensitive C-reactive Protein                                   | 1.52 $\pm$ 2.83                           | 2.53 $\pm$ 4.82   | <0.0001 |

doi:10.1371/journal.pone.0107852.t001

circumference were measured. The body mass index was calculated as the ratio of body weight (measured in kg) divided by the square of body height (measured in meter). Fasting blood samples were biochemically examined for the concentration of glucose, high-density lipoproteins (HDL), low-density lipoproteins (LDL), triglycerides, total cholesterol and high-sensitive C-reactive protein (CRP) [14,15].

The statistical analysis was performed using a commercially available software program (SAS software (version 9.3; SAS Institute Inc., Cary, NC, USA).

Arterial stiffness was defined as baPWV $\geq 1400$  cm/s, since a baPWV $\geq 1400$  cm/sec has been described as an independent risk factor in the Framingham score and for the discrimination of patients with atherosclerotic cardiovascular disease [16]. We stratified the study population into quartiles of the product of RHR and systolic blood pressure (RHR-SBP) and into quartiles of the product of RHR and mean arterial blood pressure (RHR-MAP). We described continuous variables by their means  $\pm$  standard deviations and categorical variables were described as percentages. We used the Student's t-test or ANOVA test for non-paired samples for the comparison of normally distributed parameters and the Wilcoxon or Kruskal-Wallis test for the comparison of non-parametric variables. The Chi-squared test was applied for the comparison of categorical variables. We performed multivariate logistic regression analyses to calculate odds ratios

(OR) and 95% confidence intervals (CI) for the associations of the presence of arterial stiffness (defined as baPWV $\geq 1400$  cm/s) with RHR-SBP and RHR-MAP (the lowest quartile of the latter two variables was used as the reference category). Five models were used. Model 1 was the crude model. Model 2 included age and sex as independent variables. In model 3, we adjusted for age, sex, married status, educational level, reported income of each family member, body mass index, fasting blood concentrations of glucose, triglycerides, high-density lipoprotein cholesterol, low-density lipoprotein cholesterol, total cholesterol and high-sensitive C-reactive protein, current smoking status and current alcohol drinking status. In addition to the independent parameters analyzed in model 3, model 4/5 additionally included the RHR and the systolic blood pressure and the mean blood pressure in the list of independent parameters. Finally, we used multivariate linear regression to calculate the regression coefficient by treating baPWV, RSP and RMP as continuous variables in the model. The level for statistical significance was set at  $P = 0.05$  in two-tailed tests.

## Results

Out of the 5,440 subjects who were originally included into the APAC study, we excluded 218 participants without measurements of baPWV and 69 individuals without RHR or blood pressure

**Table 2.** Comparison of Demographic and Other Characteristics of the Participants of the Asymptomatic Polyvascular Abnormalities Community Study, Stratified by Resting Heart Rate Systolic Blood Pressure Product Quartiles.

|                                                                         | Resting Heart Rate Systolic Blood Pressure Product Quartiles |              |              |              | P-Value |
|-------------------------------------------------------------------------|--------------------------------------------------------------|--------------|--------------|--------------|---------|
|                                                                         | 1                                                            | 2            | 3            | 4            |         |
| n                                                                       | 1288                                                         | 1288         | 1291         | 1286         |         |
| Age (Years)                                                             | 52.22±10.58                                                  | 53.89±11.15  | 55.55±12.00  | 58.81±12.44  | <0.0001 |
| Male Gender (Number (%))                                                | 679 (52.7%)                                                  | 738 (57.3%)  | 845 (65.5%)  | 848 (65.9%)  | <0.0001 |
| Body Mass Index (kg/m <sup>2</sup> )                                    | 23.9±2.9                                                     | 24.8±3.2     | 25.5±3.2     | 25.6±3.5     | <0.0001 |
| Marital Status (Married) (Number (%))                                   | 1263 (98.1%)                                                 | 1260 (97.8%) | 1260 (97.6%) | 1238 (96.3%) | 0.019   |
| High-School Graduation (Number (%))                                     | 1185 (92.0%)                                                 | 1146 (89.0%) | 1129 (87.5%) | 1059 (82.4%) | <0.0001 |
| Reported Income of Each Family Member (≥1000 Chinese Yuan) (Number (%)) | 1021 (79.3%)                                                 | 999 (77.6%)  | 1026 (79.5%) | 1013 (78.8%) | 0.64    |
| Current Smoker (Number (%))                                             | 363 (28.2%)                                                  | 381 (29.6%)  | 465 (36.0%)  | 446 (34.7%)  | <0.0001 |
| Current Alcohol Drinker (Number (%))                                    | 135 (10.5%)                                                  | 177 (13.7%)  | 203 (15.7%)  | 225 (17.5%)  | <0.0001 |
| Systolic Blood Pressure (mmHg)                                          | 113±12                                                       | 126±12       | 135±14       | 151±19       | <0.0001 |
| Diastolic Blood Pressure (mmHg)                                         | 75±8                                                         | 81±9         | 85±9         | 90±11        | <0.0001 |
| Mean Arterial Pressure (mmHg)                                           | 87.7±8.8                                                     | 95.9±8.5     | 101.9±9.2    | 110.4±11.7   | <0.0001 |
| Resting Heart Rate (Beats per Minute)                                   | 61.3±6.6                                                     | 67.0±6.4     | 72.0±7.1     | 81.8±11.2    | <0.0001 |
| Brachial-Ankle Pulse Wave Velocity (cm/s)                               | 1353±262                                                     | 1488±308     | 1617±352     | 1887±446     | <0.0001 |
| Resting Heart Rate Systolic Blood Pressure Product                      | 6884±640                                                     | 8356±361     | 9642±425     | 12238±1741   | <0.0001 |
| Resting Heart Rate Mean Arterial Pressure Product                       | 5343±562                                                     | 6384±430     | 7290±528     | 8979±1286    | <0.0001 |
| Fasting Blood Concentrations of:                                        |                                                              |              |              |              |         |
| Glucose (mmol/L)                                                        | 5.22±1.08                                                    | 5.44±1.36    | 5.62±1.47    | 6.07±1.89    | <0.0001 |
| High-Density Lipoprotein Cholesterol (mmol/L)                           | 1.67±0.52                                                    | 1.62±0.43    | 1.61±0.42    | 1.62±0.45    | <0.0001 |
| Low-Density Lipoprotein Cholesterol (mmol/L)                            | 2.52±0.66                                                    | 2.63±0.71    | 2.67±0.83    | 2.71±0.86    | <0.0001 |
| Triglycerides (mmol/L)                                                  | 1.36±0.94                                                    | 1.64±1.39    | 1.81±1.53    | 1.91±1.67    | <0.0001 |
| Total Cholesterol (mmol/L)                                              | 1.42±0.63                                                    | 1.51±0.69    | 1.56±0.71    | 1.64±0.75    | <0.0001 |
| High-Sensitive C-reactive Protein                                       | 1.49±2.46                                                    | 1.83±3.35    | 2.22±4.32    | 3.04±5.77    | <0.0001 |

doi:10.1371/journal.pone.0107852.t002

data. Eventually, 5153 (94.7%) subjects (3110 men) were eligible for inclusion in this study. Mean age was 55.1±11.8 years (range: 40–94 years).

The mean baPWV was 1586±400 cm/s. Within each strata, significant ( $P<0.0001$ ) linear relationships between the quartiles of all three variables, i.e., resting heart rate, mean arterial blood pressure or systolic blood pressure, and baPWV were found (Fig. 1, 2). The highest baPWV was observed in individuals from the highest quartiles of RHR and highest quartiles of systolic blood pressure or mean arterial blood pressure.

Out of the whole study population, 3190 (61.9%) individuals had a baPWV of ≥1400 cm/s. This subgroup with arterial stiffness compared to the subgroup with a baPWV of <1400 cm/s was significantly ( $P<0.05$ ) older, had a higher proportion of men, higher body mass index, lower prevalence of married status and high-school graduation, higher reported income, higher prevalence of current smoking and alcohol consumption, higher systolic and diastolic blood pressure, higher blood concentration of glucose, low-density lipoprotein cholesterol, triglycerides, total cholesterol, and high-sensitive C-reactive protein, and lower concentrations of high-density lipoprotein cholesterol (Table 1).

The mean value of RHR-SBP was 9279±2191 and the mean value of RHR-MAP was 6999±1545. Participants with a higher RHR-SBP or a higher RHR-MAP were significantly older, had a higher proportion of men, higher body mass index, lower

prevalence of high-school graduation, higher prevalence of current smoking and alcohol consumption, higher systolic and diastolic blood pressure, higher blood concentration of glucose, low-density lipoprotein cholesterol, triglycerides, total cholesterol, and high-sensitive C-reactive protein, and lower concentrations of high-density lipoprotein cholesterol (Tables 2, 3).

In all five models of the multivariable logistic regression analysis, the OR for arterial stiffness (defined as baPWV≥1400 cm/s) increased significantly ( $P<0.0001$ ) with increasing RHR-SBP quartile and higher RHR-MAP quartile. After adjusting for all independent variables assessed in the study and comparing the highest quartiles with the lowest quartiles of RHR-SBP or RHR-MAP revealed an OR of 2.72 (95%CI: 1.46–5.08) for RHR-SBP and an OR of 2.10 (95%CI: 1.18–3.72) for RHR-MAP (Table 4).

If instead the study population was not stratified into quartiles and the outcome parameters were not used as categorical variables but if baPWV, heart rate and blood pressure were taken as continuous variables, similar results in the statistical analysis were obtained. In all the multivariate linear regression analyses, elevated baPWV was significantly associated with increased RSP and RMP. RSP and RMP remained to be independently associated with baPWV after adjusting for all confounders (Table 5). In all these calculations, the variance inflation factor as part of the analysis of collinearity was lower than 10.

**Table 3.** Comparison of Demographic and Other Characteristics of the Participants of the Asymptomatic Polyvascular Abnormalities Community Study, Stratified by Resting Heart Rate Mean Arterial Pressure Product Quartiles.

|                                                                   | Resting Heart Rate Mean Arterial Pressure Product Quartiles |              |              |              | P-Value |
|-------------------------------------------------------------------|-------------------------------------------------------------|--------------|--------------|--------------|---------|
|                                                                   | 1                                                           | 2            | 3            | 4            |         |
| n                                                                 | 1287                                                        | 1289         | 1289         | 1288         |         |
| Age (Years)                                                       | 54.57±12.33                                                 | 54.34±11.47  | 55.15±11.58  | 56.41±11.77  | <0.0001 |
| Male Gender (Number (%))                                          | 686 (53.3%)                                                 | 740 (57.4%)  | 818 (63.5%)  | 866 (67.2%)  | <0.0001 |
| Body Mass Index (kg/m <sup>2</sup> )                              | 23.9±2.9                                                    | 24.7±3.1     | 25.4±3.2     | 25.8±3.4     | <0.0001 |
| Marital Status (Married) (Number (%))                             | 1255 (97.5%)                                                | 1253 (97.2%) | 1259 (97.7%) | 1254 (97.4%) | 0.89    |
| High-School Graduation (Number (%))                               | 1157 (89.9%)                                                | 1145 (88.8%) | 1138 (88.3%) | 1079 (83.8%) | <0.0001 |
| Reported Income of Each Family Member (≥1000¥, in %) (Number (%)) | 1037 (80.6%)                                                | 1008 (78.2%) | 1008 (78.2%) | 1006 (78.1%) | 0.34    |
| Current Smoker (Number (%))                                       | 349 (27.1%)                                                 | 382 (29.6%)  | 443 (34.4%)  | 481 (37.3%)  | <0.0001 |
| Current Alcohol Drinker (Number (%))                              | 123 (9.6%)                                                  | 170 (13.2%)  | 191 (14.8%)  | 256 (19.9%)  | <0.0001 |
| Systolic Blood Pressure (mmHg)                                    | 116±15                                                      | 127±15       | 135±16       | 148±19       | <0.0001 |
| Diastolic Blood Pressure (mmHg)                                   | 73±8                                                        | 80±8         | 85±8         | 92±10        | <0.0001 |
| Mean Arterial Pressure (mmHg)                                     | 88±9                                                        | 96±8         | 102±9        | 111±11       | <0.0001 |
| Resting Heart Rate (Beats per Minute)                             | 61±6                                                        | 67±6         | 72±6         | 83±11        | <0.0001 |
| Brachial-Ankle Pulse Wave Velocity (cm/s)                         | 1405±310                                                    | 1504±333     | 1620±386     | 1815±438     | <0.0001 |
| Resting Heart Rate Systolic Blood Pressure Product                | 6983±780                                                    | 839±656      | 9636±770     | 12101±1854   | <0.0001 |
| Resting Heart Rate Mean Arterial Pressure Product                 | 5279±494                                                    | 6358±247     | 7289±306     | 9067±1193    | <0.0001 |
| Fasting Blood Concentrations of:                                  |                                                             |              |              |              |         |
| Glucose (mmol/L)                                                  | 5.31±1.28                                                   | 5.40±1.25    | 5.61±1.43    | 6.02±1.89    | <0.0001 |
| High-Density Lipoprotein Cholesterol (mmol/L)                     | 1.67±0.53                                                   | 1.64±0.44    | 1.61±0.42    | 1.60±0.44    | 0.002   |
| Low-Density Lipoprotein Cholesterol (mmol/L)                      | 2.51±0.67                                                   | 2.62±0.70    | 2.67±0.84    | 2.72±0.84    | <0.0001 |
| Triglycerides (mmol/L)                                            | 1.37±0.98                                                   | 1.58±1.26    | 1.80±1.58    | 1.96±1.71    | <0.0001 |
| Total Cholesterol (mmol/L)                                        | 1.43±0.64                                                   | 1.52±0.69    | 1.57±0.71    | 1.62±0.75    | <0.0001 |
| High-Sensitive C-reactive Protein                                 | 1.59±2.48                                                   | 1.90±3.83    | 2.20±4.20    | 2.89±5.57    | <0.0001 |

doi:10.1371/journal.pone.0107852.t003

## Discussion

We tested the hypothesis that in addition to pulse rate and independently of other cardiovascular risk factors, the product of pulse rate multiplied with blood pressure would be correlated with baPWV as a measure of arterial stiffness. We found in our relatively large cross-sectional study, that a high product of resting heart rate multiplied with systolic blood pressure (RHR-SBP) and a high product of resting heart rate multiplied with the mean arterial blood pressure (RHR-MAP) were significantly associated with a higher prevalence of arterial stiffness. These associations were maintained after adjusting for systemic parameters in multivariate analysis. Fitting with the hypothesis, the findings suggest that RHR-SBP and RHR-MAP were independently of other systemic vascular risk factors associated with arterial stiffness.

The results of our study agree with the findings of previous investigations in that the baPWV was associated with factors such as older age, hypercholesterolemia, diabetes mellitus, cigarette smoking, higher blood concentration of C-reactive protein, and presence of a metabolic syndrome [17–29]. In addition to the previous findings, our data demonstrated a significant relationship between baPWV and RHR-SBP or RHR-MAP, independently of the factors the association of which with baPWV had previously been shown. The results of our study are in agreement with the reported association between a high heart rate and baPWV [9–

11], as well as with the association between a high resting heart rate and an increased cardiovascular risk [30].

The results of our study may have importance clinically and in the discussion of the pathogenesis of arterial stiffening. Clinically, one may consider the product of heart rate and blood pressure as an additional marker in the assessment of the general vascular risk spectrum of patients. Pathogenetically, one has previously postulated that the age-related increase in pulse wave velocity is caused by a fatigue fracture of elastic elements in the arterial vessel wall [8]. The rate of elastin fracture may depend on the number of stress cycles and the amplitude of the related vessel wall stress [31]. Both parameters are measured by the pulse rate (i.e., frequency of stress cycles) and blood pressure. The results of our study that independently of other vascular risk factors the product of heart rate and blood pressure was associated with an increased baPWV in a general population, therefore supports the notion of arterial vessel wall related changes in dependence on the frequency of cyclic vessel wall movements and the amount of the movements.

Potential limitations of our study should be mentioned. First, a cross-sectional study as ours cannot prove a causal relationship which usually has to be shown in a longitudinal investigation. The results of our study only allow concluding on an association between RHR-SBP or RHR-MAP and arterial stiffness, while the role of RHR-SBP or RHR-MAP as a risk factor for arterial stiffness may be shown in follow-up investigations. The lack of

**Table 4.** Odds Ratios (95% Confidence Intervals) for the Associations between Arterial Stiffness (Defined as a Brachial-Ankle Pulse Wave Velocity  $\geq 1400$  cm/s) with Resting Heart Rate Systolic Blood Pressure Product Quartiles and Resting Heart Rate Mean Arterial Pressure Product Quartiles in the Asymptomatic Polyvascular Abnormalities Community Study.

|                                                             | Quartile 1  | Quartile 2    | Quartile 3    | Quartile 4       |
|-------------------------------------------------------------|-------------|---------------|---------------|------------------|
| Resting Heart Rate Systolic Blood Pressure Product Range    | 4500–7737   | 7739–8998     | 9000–10488    | 10496–23114      |
| Number of Participants with Arterial Stiffness (Number (%)) | 413 (13.0%) | 714 (22.4%)   | 907 (28.4%)   | 1156 (36.2%)     |
| Model 1                                                     | 1           | 2.6 (2.2–3.1) | 5.0 (4.2–5.9) | 18.8 (15.2–23.4) |
| Model 2                                                     | 1           | 3.0 (2.5–3.6) | 5.6 (4.6–6.8) | 19.0 (15.0–24.2) |
| Model 3                                                     | 1           | 2.8 (2.3–3.4) | 5.1 (4.1–6.2) | 16.4 (12.7–21.0) |
| Model 4                                                     | 1           | 1.5 (1.2–2.0) | 1.8 (1.2–2.6) | 2.7 (1.5–5.1)    |
| Resting Heart Rate Mean Arterial Pressure Product, Range    | 2728–5908   | 5908–6784     | 6785–7855     | 7857–17921       |
| Number of arterial stiffness (Number (%))                   | 499 (15.6%) | 704 (22.1%)   | 888 (27.8%)   | 1099 (34.5%)     |
| Model 1                                                     | 1           | 1.9 (1.6–2.2) | 3.5 (3.0–4.1) | 9.2 (7.6–11.1)   |
| Model 2                                                     | 1           | 2.6 (2.1–3.1) | 5.2 (4.1–6.2) | 13.9 (11.2–17.4) |
| Model 3                                                     | 1           | 2.4 (2.0–3.0) | 4.6 (3.7–5.6) | 11.6 (9.2–14.7)  |
| Model 5                                                     | 1           | 1.3 (1.0–1.8) | 1.6 (1.1–2.3) | 2.1 (1.2–3.7)    |

Model 1: unadjusted.

Model 2: adjusted for age and sex.

Model 3: adjusted for age, sex, married status, educational level, reported income of each family member, body mass index, fasting blood concentrations of glucose, triglycerides, high-density lipoprotein cholesterol, low-density lipoprotein cholesterol, total cholesterol and high-sensitivity C-reactive protein, current smoking status, and current alcohol drinking status.

Model 4: adjusted for the same independent parameters as in Model 3, plus resting heart rate and systolic blood pressure.

Model 5: adjusted for the same independent parameters as in Model 3, plus resting heart rate and mean arterial pressure.

doi:10.1371/journal.pone.0107852.t004

analysis on causality may be of particular importance for our study, since it is unclear whether the observed association between baPWV and resting heart rate, blood pressure or the product of both was truly attributable to mechanical reasons, or only because they share some common risk factors, such as an increased sympathetic tone. Second, baPWV has limitations as a biomarker of arterial stiffness, since here is no real artery passing through the brachial point and ankle point. An alternative to the baPWVC would have been the carotid-femoral pulse wave velocity which may be addressed in future investigations. Third, the RHR was calculated from one electrocardiography recording. The RHR

however depends on the daytime, so that the assessment of the mean RHR might have been more precise if performed in several measurements during a 24 hours profile.

In conclusion, a higher baPWV as a marker of arterial stiffness was associated with a higher product of RHR and blood pressure in multivariate analysis. In addition to other vascular risk factors, higher RHR in combination with higher blood pressure are risk factors for arterial stiffness. Using the product of RHR and blood pressure may be useful in the clinical assessment of the vascular risk spectrum of patients.

**Table 5.** Regression Coefficient of the Brachial-Ankle Pulse Wave Velocity with the Product of Resting Heart Rate and Blood Pressure.

|              | Resting Heart Rate Systolic Blood Pressure Product |         | Resting Heart Rate Mean Arterial Pressure Product |         |
|--------------|----------------------------------------------------|---------|---------------------------------------------------|---------|
|              | $\beta$                                            | P-Value | $\beta$                                           | P-Value |
| Model 1      | 0.0958                                             | <0.0001 | 0.1069                                            | <0.0001 |
| Model 2      | 0.0744                                             | <0.0001 | 0.0962                                            | <0.0001 |
| Model 3      | 0.0725                                             | <0.0001 | 0.0928                                            | <0.0001 |
| Model 4 or 5 | 0.1047                                             | <0.0001 | 0.0936                                            | <0.0001 |

baPWV, Brachial-Ankle Pulse Wave Velocity.

Model 1: unadjusted.

Model 2: adjusted for age and sex.

Model 3: adjusted for age, sex, married status, educational level, reported income of each family member, body mass index, fasting blood concentrations of glucose, triglycerides, high-density lipoprotein cholesterol, low-density lipoprotein cholesterol, total cholesterol and high-sensitivity C-reactive protein, current smoking status, and current alcohol drinking status.

Model 4: adjusted for the same independent parameters as in Model 3, plus resting heart rate and systolic blood pressure.

Model 5: adjusted for the same independent parameters as in Model 3, plus resting heart rate and mean arterial pressure.

doi:10.1371/journal.pone.0107852.t005

## Acknowledgments

We thank all study participants, their relatives, the members of the survey teams, and the project development and management teams at the Beijing Tiantan hospital and the Kailuan Group.

## References

1. Asmar R, Benetos A, Topouchian J, Laurent P, Pannier B, et al. (1995) Assessment of arterial distensibility by automatic pulse wave velocity measurement. Validation and clinical application studies. *Hypertension* 26:485–490.
2. Lehmann ED (1999) Clinical value of aortic pulse-wave velocity measurement. *Lancet* 354:528–529.
3. Blacher J, Asmar R, Djane S, London GM, Safar ME (1999) Aortic pulse wave velocity as a marker of cardiovascular risk in hypertensive patients. *Hypertension* 33:1111–1117.
4. van Popele N, Grobbee DE, Bots ML, Asmar R, Topouchian J, et al. (2001) Association between arterial stiffness and atherosclerosis: the Rotterdam Study. *Stroke* 32:454–460.
5. Laurent S, Boutouyrie P, Asmar R, Gautier I, Laloux B, et al. (2001) Aortic stiffness is an independent predictor of all-cause and cardiovascular mortality in hypertensive patients. *Hypertension* 37:1236–1241.
6. Asmar R, Rudnichi A, Blacher J, London GM, Safar ME (2001) Pulse pressure and aortic pulse wave are markers of cardiovascular risk in hypertensive populations. *Am J Hypertens* 14:91–97.
7. Blacher J, Guerin AP, Pannier B, Marchais SJ, Safar ME, et al. (1999) Impact of aortic stiffness on survival in end-stage renal disease. *Circulation* 99:2434–2439.
8. O'Rourke MF (1976) Pulsatile arterial haemodynamics in hypertension. *Aust N Z J Med* 6 Suppl 2:40–48.
9. Palatini P, Parati G (2010) Persistently elevated heart rate accelerates the progression of arterial stiffness. *J Hypertens* 28:653–656.
10. Park BJ, Lee HR, Shim JY, Lee JH, Jung DH, et al. (2010) Association between resting heart rate and arterial stiffness in Korean adults. *Arch Cardiovasc Dis* 103:246–252.
11. Whelton SP, Blankstein R, Al-Mallah MH, Lima JA, Bluemke DA, et al. (2013) Association of resting heart rate with carotid and aortic arterial stiffness: Multi-ethnic study of atherosclerosis. *Hypertension* 62:477–484.
12. Suzuki E, Kashiwagi A, Nishio Y, Egawa K, Shimizu S, et al. (2001) Increased arterial wall stiffness limits flow volume in the lower extremities in type 2 diabetic patients. *Diabetes Care* 24:2107–2114.
13. Yamashina A, Tomiyama H, Takeda K, Tsuda H, Arai T, et al. (2002) Validity, reproducibility, and clinical significance of noninvasive brachial-ankle pulse wave velocity measurement. *Hypertens Res* 25:359–364.
14. Zhou Y, Li Y, Xu L, Xu J, Wang A, et al. (2013) Asymptomatic polyvascular abnormalities in community (apac) study in china: Objectives, design and baseline characteristics. *PLoS One* 8:e84685.
15. Wang A, Wu J, Zhou Y, Guo X, Luo Y, et al. (2013) Measures of adiposity and risk of stroke in china: A result from the Kailuan study. *PLoS One* 8:e61665.
16. Yamashina A, Tomiyama H, Arai T, Hirose K, Koji Y, et al. (2003) Brachial-ankle pulse wave velocity as a marker of atherosclerotic vascular damage and cardiovascular risk. *Hypertens Res* 26:615–622.
17. Avolio AP, Deng FQ, Li WQ, Luo YF, Huang ZD, et al. (1985) Effects of aging on arterial distensibility in populations with high and low prevalence of

## Author Contributions

Conceived and designed the experiments: AW JT XG XML YL XRL ZH SC XZ JBJ SW. Performed the experiments: AW JT XG XML YL XRL ZH SC XZ JBJ SW. Analyzed the data: AW JT XG XML YL XRL ZH SC XZ JBJ SW. Contributed reagents/materials/analysis tools: XZ. Contributed to the writing of the manuscript: AW JT XG XML YL XRL ZH SC XZ JBJ SW.

- hypertension: Comparison between urban and rural communities in china. *Circulation* 71:202–210.
18. McEnery CM, Yasmin, Hall IR, Qasem A, Wilkinson IB, et al. (2005) Normal vascular aging: differential effects on wave reflection and aortic pulse wave velocity: the Anglo-Cardiff Collaborative Trial (ACCT). *J Am Coll Cardiol* 46:1753–1760.
19. Gordon SM, Davidson WS, Urbina EM, Dolan LM, Heink A, et al. (2013) The effects of type 2 diabetes on lipoprotein composition and arterial stiffness in male youth. *Diabetes* 62:2958–2967.
20. Rhee MY, Na SH, Kim YK, Lee MM, Kim HY (2007) Acute effects of cigarette smoking on arterial stiffness and blood pressure in male smokers with hypertension. *Am J Hypertens* 20:637–641.
21. Levenson J, Simon AC, Cambien FA, Beretti C (1987) Cigarette smoking and hypertension. Factors independently associated with blood hyperviscosity and arterial rigidity. *Arteriosclerosis* 7:572–577.
22. Mattace-Raso FU, van der Cammen TJ, van der Meer IM, Schalekamp MA, Asmar R, et al. (2004) C-reactive protein and arterial stiffness in older adults: The Rotterdam Study. *Atherosclerosis* 176:111–116.
23. Tomiyama H, Koji Y, Yambe M, Motobe K, Shiina K, et al. (2005) Elevated C-reactive protein augments increased arterial stiffness in subjects with the metabolic syndrome. *Hypertension* 45:997–1003.
24. Woodard GA, Mehta VG, Mackey RH, Tepper P, Kelsey SF, et al. (2011) C-reactive protein is associated with aortic stiffness in a cohort of african american and white women transitioning through menopause. *Menopause* 18:1291–1297.
25. Yasmin, McEnery CM, Wallace S, Mackenzie IS, Cockcroft JR, et al. (2004) C-reactive protein is associated with arterial stiffness in apparently healthy individuals. *Arterioscler Thromb Vasc Biol* 24:969–974.
26. Sipila K, Koivisto T, Moilanen L, Nieminen T, Reunanen A, et al. (2007) Metabolic syndrome and arterial stiffness: The health 2000 survey. *Metabolism* 56:320–326.
27. Kangas P, Tikkanen AJ, Tahvanainen AM, Leskinen MH, Viitala JM, et al. (2013) Metabolic syndrome may be associated with increased arterial stiffness even in the absence of hypertension: A study in 84 cases and 82 controls. *Metabolism* 62:1114–22.
28. Weng C, Yuan H, Yang K, Tang X, Huang Z, et al. (2013) Gender-specific association between the metabolic syndrome and arterial stiffness in 8,300 subjects. *Am J Med Sci* 346:289–294.
29. Scuteri A, Cunha PG, Rosei EA, Badierie J, Bekaert S, et al. (2014) Arterial stiffness and influences of the metabolic syndrome: A cross-countries study. *Atherosclerosis* 233:654–660.
30. Custodis F, Reil JC, Laufs U, Bohm M (2013) Heart rate: A global target for cardiovascular disease and therapy along the cardiovascular disease continuum. *J Cardiol* 62:183–187.
31. Greenwald SE (2007) Ageing of the conduit arteries. *J Pathol* 211:157–172.
